# Supplementary material
Source: PubMed Central journal article supplement (PMC8323477)
Supplement: NIHMS1723153-supplement-Supplementary_tables_and_figures.pdf [file NIHMS1723153-supplement-Supplementary_tables_and_figures.pdf]

## *Supporting Information for*

### **Spray-Capillary Based Capillary Electrophoresis Mass Spectrometry for Metabolite Analysis in Single Cells**

*Lushuang Huang<sup>1</sup>, Mulin Fang<sup>1</sup>, Kellye A. Cupp-Sutton<sup>1</sup>, Zhe Wang<sup>1</sup>, Kenneth Smith<sup>2</sup>, and Si Wu<sup>1\*</sup>*

1. Department of Chemistry and Biochemistry, University of Oklahoma, Norman, OK 73019
2. Department of Arthritis and Clinical Immunology, Oklahoma Medical Research Foundation, Oklahoma City, OK 73104

\*To whom correspondence should be addressed: **Si Wu**, Email: si.wu@ou.edu

#### **Abstract**

Single-cell capillary electrophoresis mass spectrometry (CE-MS) is a promising platform to analyze cellular contents and probe cell heterogeneity. However, current single-cell CE-MS methods often rely on offline microsampling processes and may demonstrate low sampling precision and accuracy. We have recently developed an electrospray-assisted device, spray-capillary, for low-volume sample extraction. With the spray-capillary, low-volume samples (pL~nL) are drawn into the sampling end of the device, which can be used directly for CE separation and online MS detection. Here, we re-designed the spray-capillary by utilizing a capillary with a <15  $\mu\text{m}$  tapered-tip so that it can be directly inserted into single cells for sample collection and on-capillary CE-MS analysis. We evaluated the performance of the modified spray-capillary by performing single-cell microsampling on single onion cells with varying sample injection time and direct MS analysis or online CE-MS analysis. We have demonstrated, for the first time, online sample collection and CE-MS for the analysis of single cells. This application of the modified spray-capillary device facilitates the characterization and relative quantification of hundreds of metabolites in single cells.

## Table of Contents

|                                                                                                                                                 |           |
|-------------------------------------------------------------------------------------------------------------------------------------------------|-----------|
| <b>Table of Contents</b> .....                                                                                                                  | <b>S2</b> |
| <b>Figure S1.</b> Triplicate sample extraction from <i>A. cepa</i> single cells using the modified spray-capillary device.....                  | <b>S3</b> |
| <b>Figure S2.</b> Comparison between blank and onion sample.....                                                                                | <b>S4</b> |
| <b>Figure S3.</b> MS/MS spectra of phenylalanine, malic acid, and glucose.....                                                                  | <b>S5</b> |
| <b>Figure S4.</b> MS/MS spectra of (A) nystose (DP4) with sodium adduct, (B) sucrose with potassium adduct, (C) arginine, and (D) tyrosine..... | <b>S6</b> |
| <b>Figure S5.</b> CE separation of standard metabolites and comparison with same metabolites from onion extracts.....                           | <b>S7</b> |
| <b>Table S1.</b> Characterization of metabolites using proposed spray-capillary CE-MS system.....                                               | <b>S8</b> |
| <b>Table S2.</b> Relative migration time comparison between standard metabolites and corresponding onion metabolites.....                       | <b>S9</b> |

## Supplementary Figures:

**Figure S1.** Triplicate sample extraction from *A. cepa* single cells using the modified spray-capillary device. (A) Total ion chromatograms from three replicate single cell injections; (B) the summed spectrum of the eluted peak from each analysis. The spray-capillary used is a 360  $\mu\text{m}$  O.D X50  $\mu\text{m}$  I.D. long capillary (50 cm in length) with a tapered tip at the sample inlet end. For sample injection, the electrospray voltage was 3 kV, and the sample injection time was 5 s (NL: normalization level).

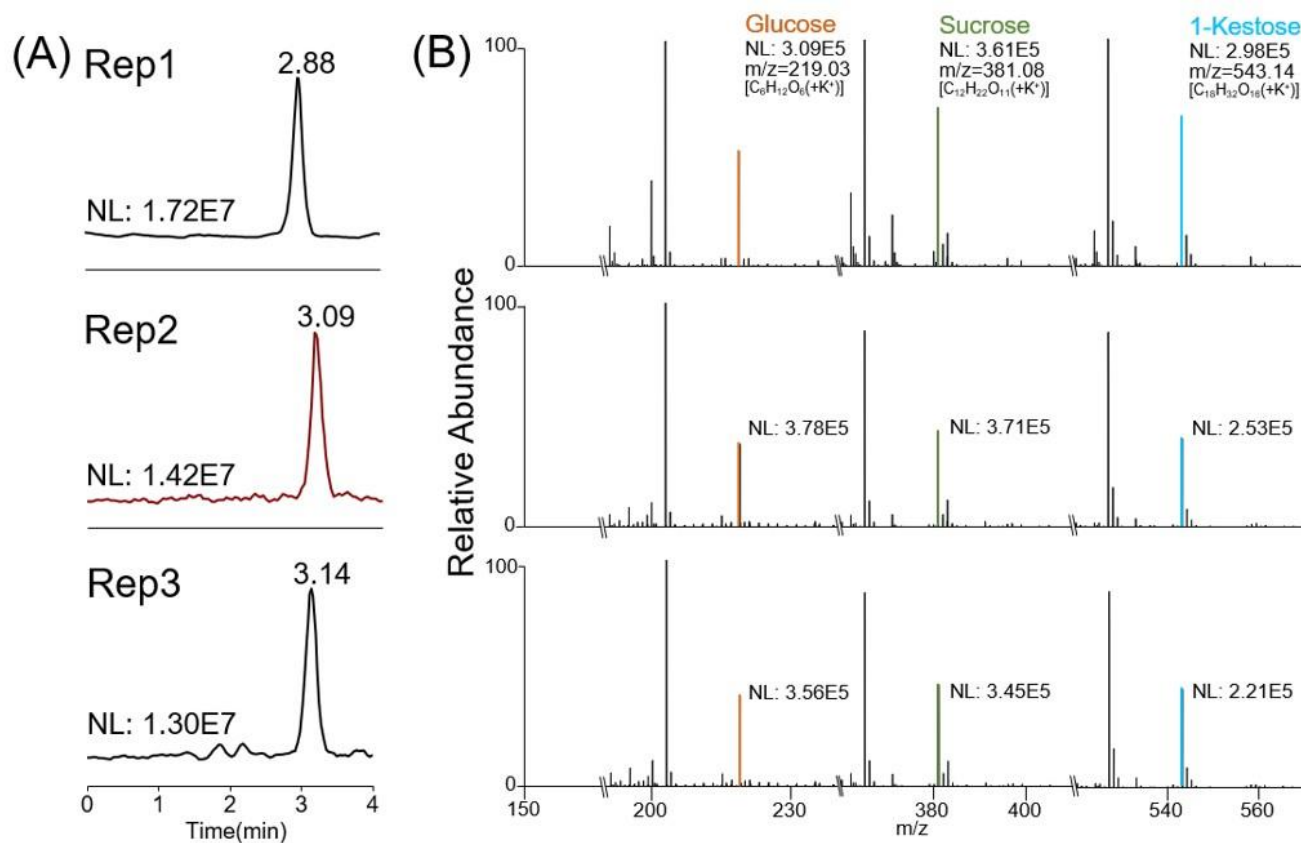

**Figure S2.** Comparison between control (buffer) and normal (onion) trial. (A) Normalized base peak chromatogram of control and onion trial. (B) Normalized averaged spectrum of control trial and onion trial. NL: normalization level.

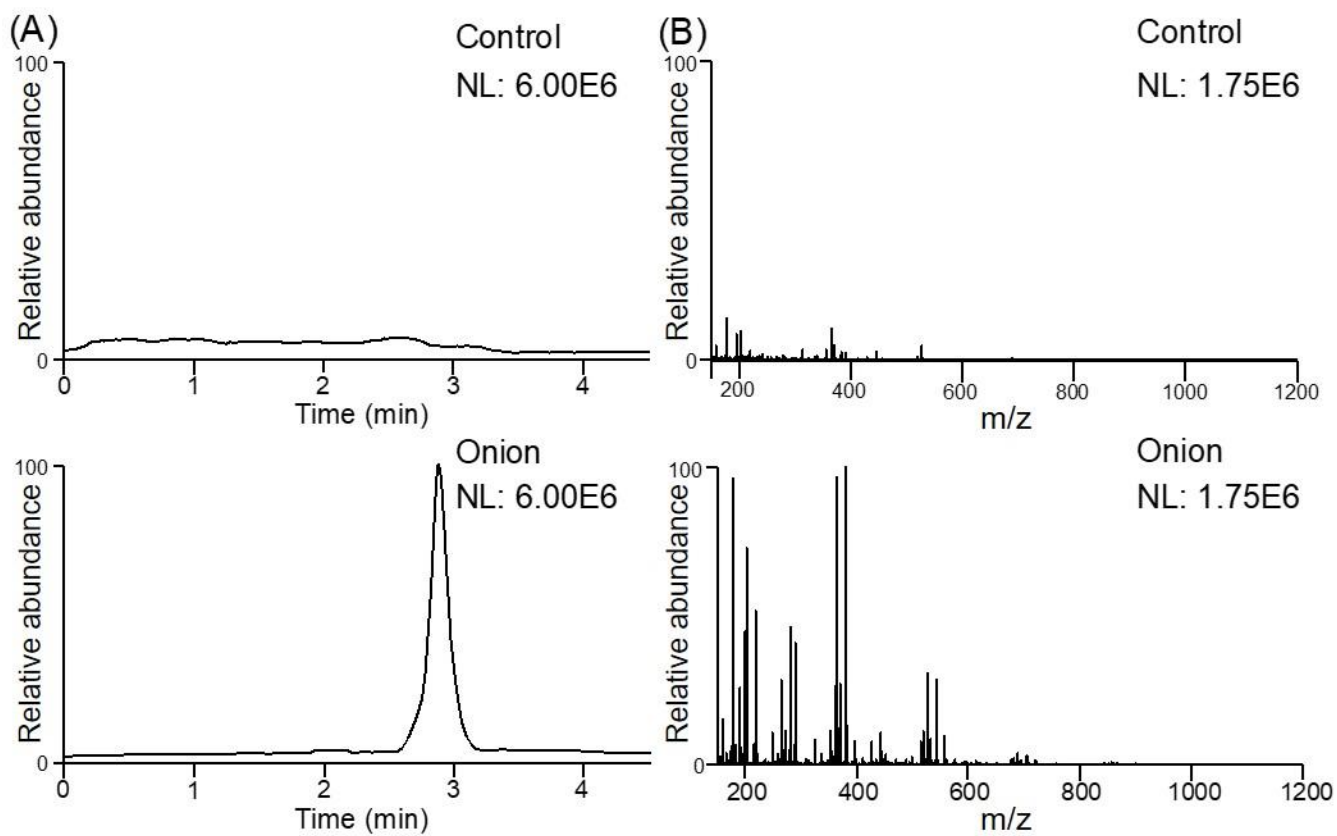

**Figure S3.** MS/MS identification of (A) phenylalanine, (B) glucose with sodium adduct, and (C) malic acid with sodium adduct.

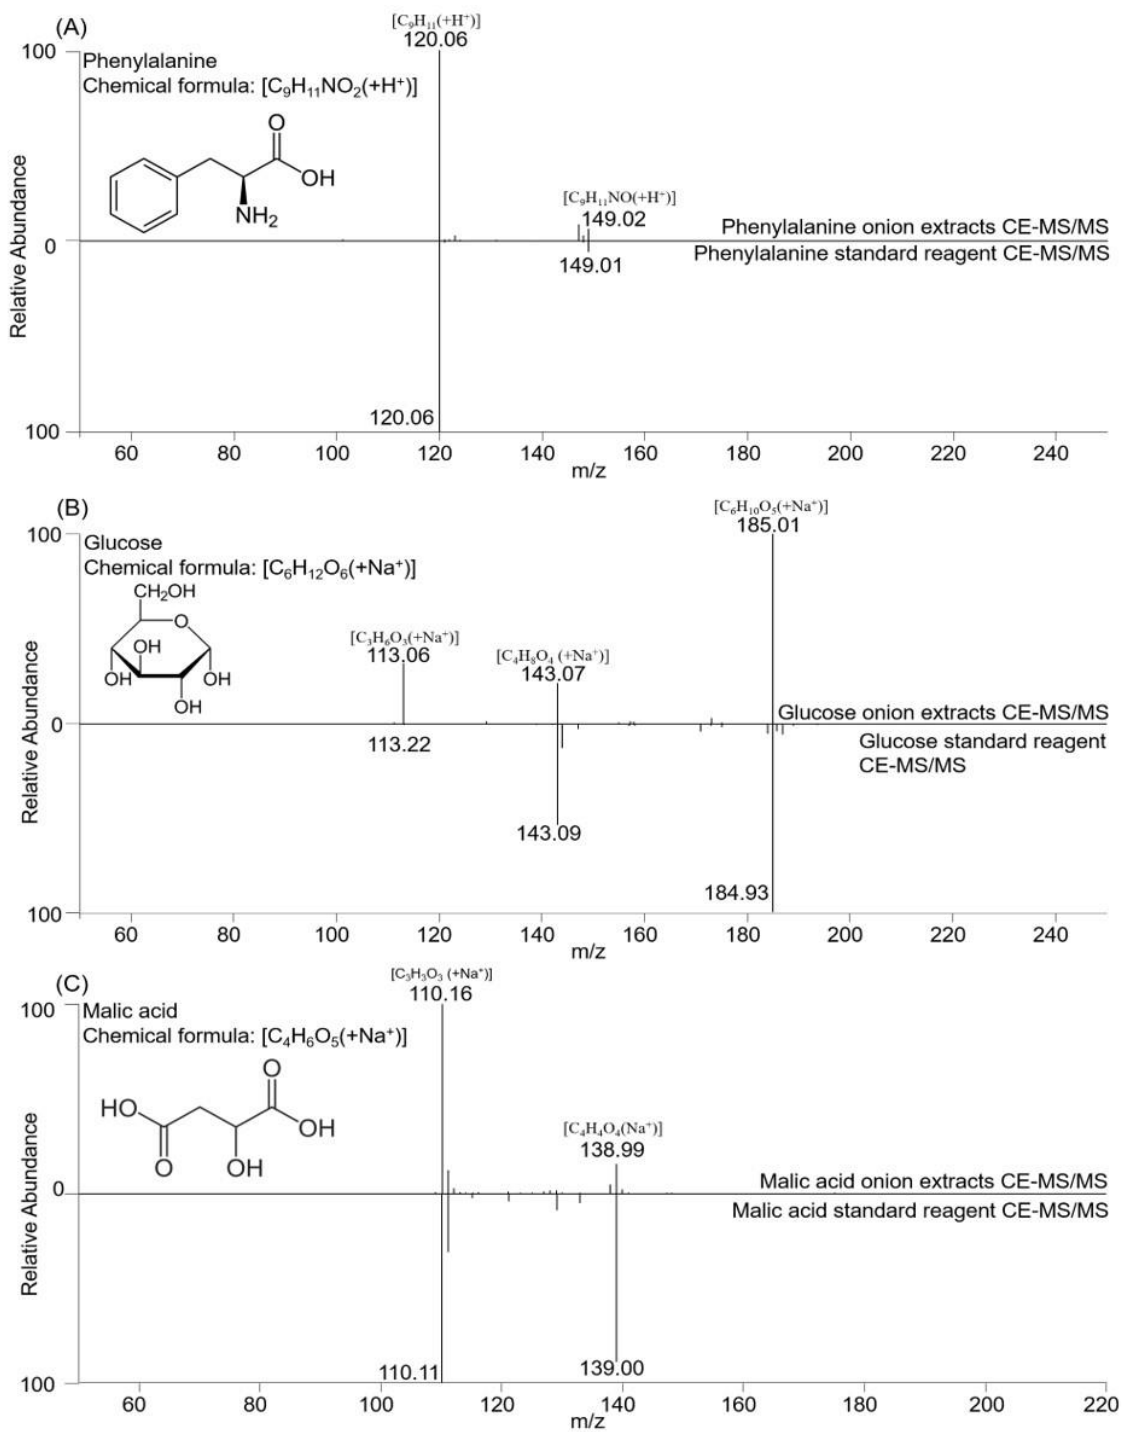

**Figure S4.** MS/MS spectra of (A) nystose (DP4) with sodium adduct, (B) sucrose with potassium adduct, (C) arginine, and (D) tyrosine.

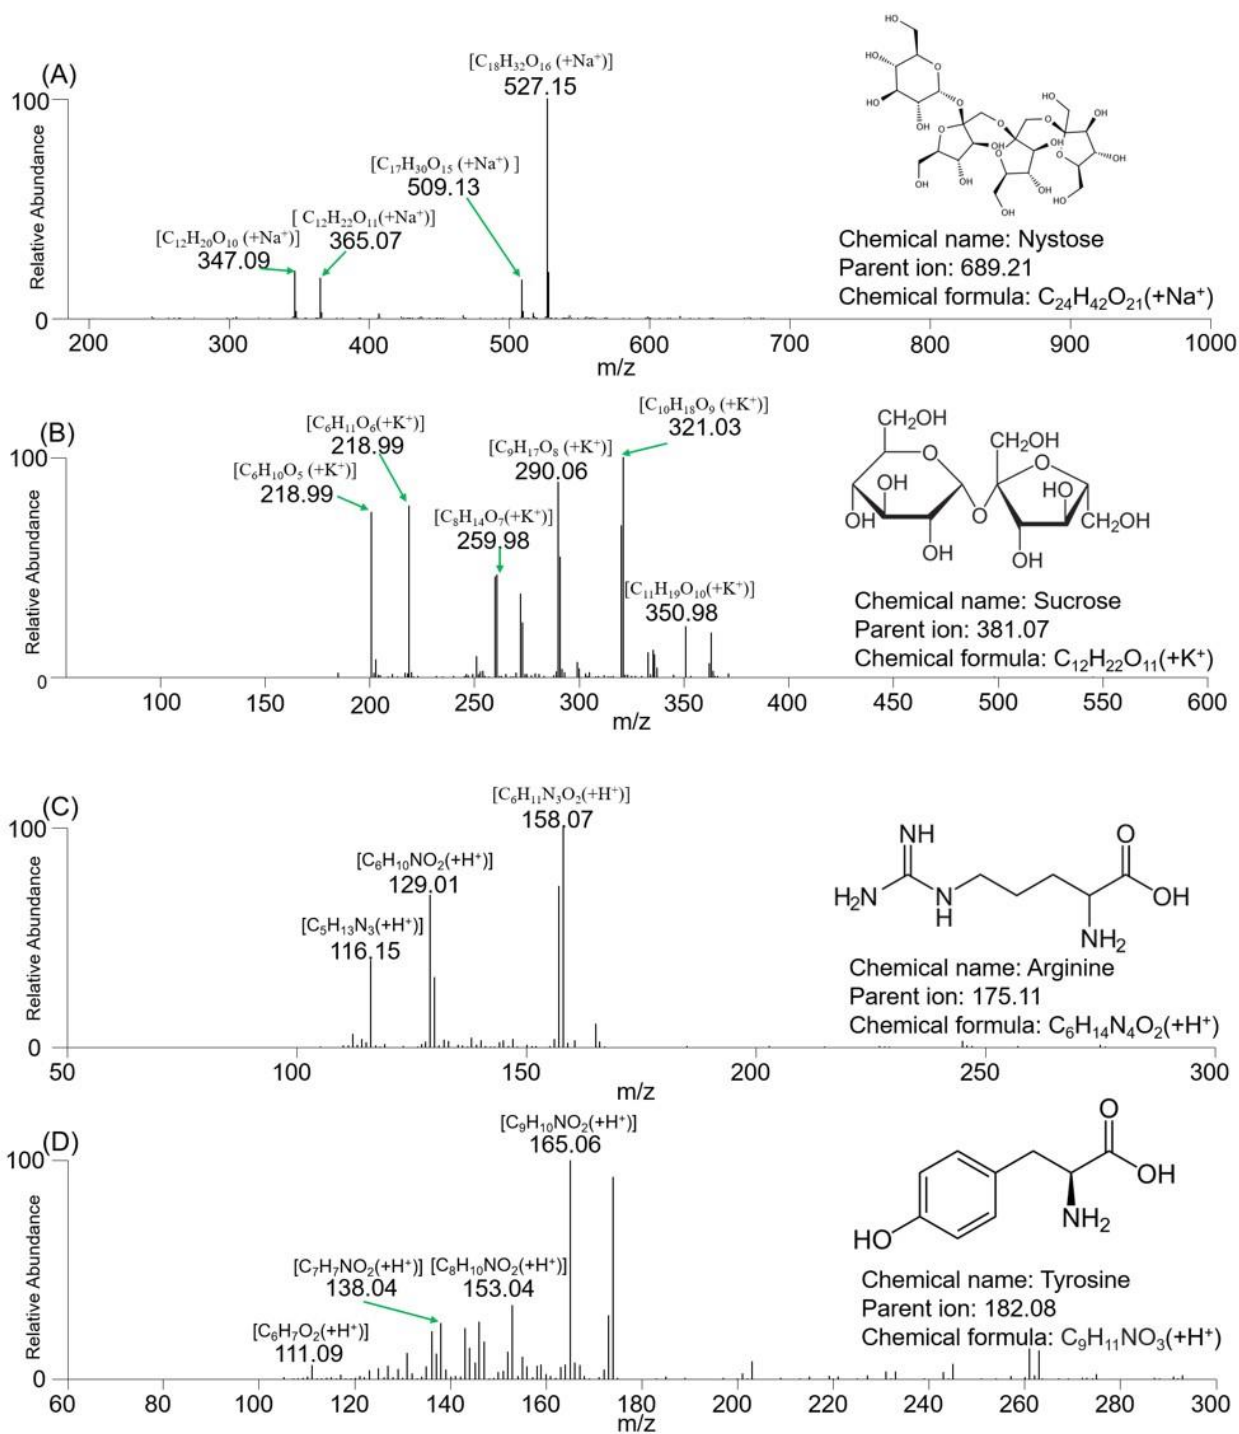

**Figure S5.** CE separation of standard metabolites and comparison with same metabolites from onion extracts.

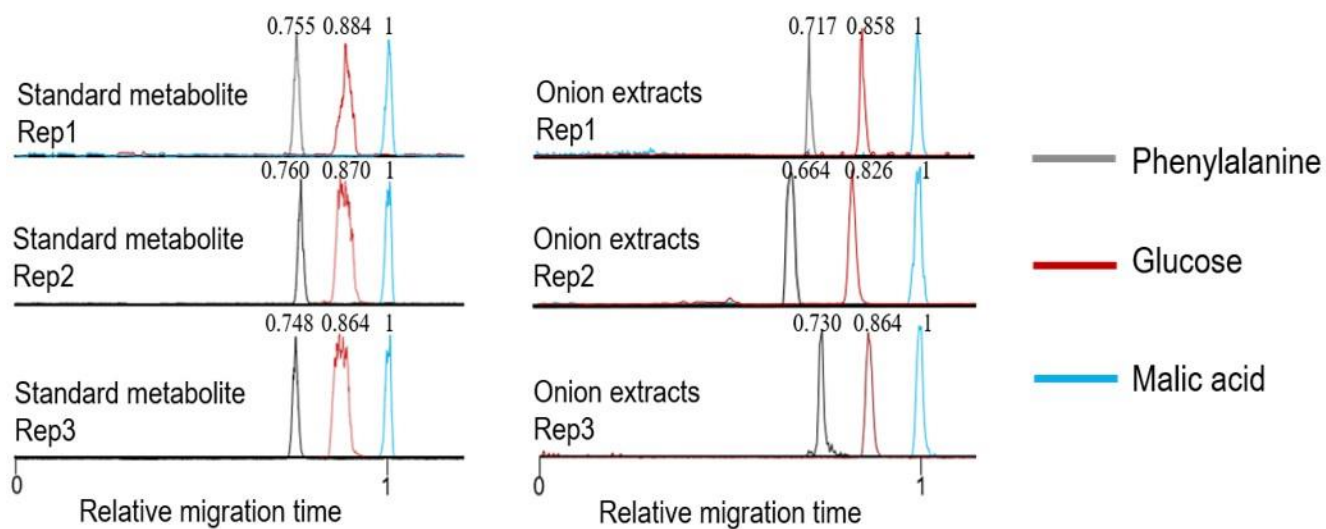

**Table S1.** Characterization of metabolites using spray-capillary CE-MS system.

| Metabolite                                                                                           | Replicate # | Peak area | RSD (Peak area) | Relative migration time | RSD   |
|------------------------------------------------------------------------------------------------------|-------------|-----------|-----------------|-------------------------|-------|
| Malic acid<br>[C <sub>4</sub> H <sub>6</sub> O <sub>5</sub> (+Na <sup>+</sup> )]                     | R1          | 2.98E5    | 17.0%           | 1                       | N/A   |
|                                                                                                      | R2          | 2.62E5    |                 |                         |       |
|                                                                                                      | R3          | 3.66E5    |                 |                         |       |
| Phenylalanine<br>[C <sub>9</sub> H <sub>11</sub> NO <sub>2</sub> (+H <sup>+</sup> )]                 | R1          | 2.62E5    | 35.3%           | 0.664                   | 4.89% |
|                                                                                                      | R2          | 5.20E5    |                 |                         |       |
|                                                                                                      | R3          | 5.49E5    |                 |                         |       |
| Cycloalliin<br>[C <sub>6</sub> H <sub>11</sub> NO <sub>3</sub> S(+H <sup>+</sup> )]                  | R1          | 1.08E7    | 16.3%           | 0.752                   | 3.85% |
|                                                                                                      | R2          | 9.72E6    |                 |                         |       |
|                                                                                                      | R3          | 1.33E7    |                 |                         |       |
| Glucose<br>[C <sub>6</sub> H <sub>12</sub> O <sub>6</sub> (Na <sup>+</sup> )]                        | R1          | 1.64E7    | 16.8%           | 0.824                   | 2.63% |
|                                                                                                      | R2          | 1.40E7    |                 |                         |       |
|                                                                                                      | R3          | 1.96E7    |                 |                         |       |
| Methyl cysteine<br>sulfoxide<br>[C <sub>4</sub> H <sub>9</sub> NO <sub>3</sub> S (+H <sup>+</sup> )] | R1          | 1.58E5    | 3.78%           | 0.748                   | 3.79% |
|                                                                                                      | R2          | 1.49E5    |                 |                         |       |
|                                                                                                      | R3          | 1.48E5    |                 |                         |       |
| Adenosine<br>[C <sub>10</sub> H <sub>13</sub> N <sub>5</sub> O <sub>4</sub> (+H <sup>+</sup> )]      | R1          | 7.67E4    | 10.7%           | 0.459                   | 8.61% |
|                                                                                                      | R2          | 7.82E4    |                 |                         |       |
|                                                                                                      | R3          | 6.39E4    |                 |                         |       |



**Table S2.** Relative migration time comparison between standard metabolites and corresponding onion metabolites.

| Trials                       | Replicate # | Relative migration time |         |
|------------------------------|-------------|-------------------------|---------|
|                              |             | Phenylalanine           | Glucose |
| Standard metabolites mixture | Rep1        | 0.755                   | 0.884   |
|                              | Rep2        | 0.760                   | 0.870   |
|                              | Rep3        | 0.748                   | 0.864   |
| Average (Standards)          | N/A         | 0.754                   | 0.872   |
| RSD (Standards)              | N/A         | 0.80%                   | 1.18%   |
| Onion extracts               | Rep1        | 0.717                   | 0.858   |
|                              | Rep2        | 0.664                   | 0.826   |
|                              | Rep3        | 0.730                   | 0.864   |
| Average (Onion extracts)     | N/A         | 0.703                   | 0.849   |
| RSD (Onion extracts)         | N/A         | 4.97%                   | 2.41%   |
